# Supplementary material for: Adipose tissue gene expression of CXCL10 and CXCL11 modulates inflammatory markers in obesity: implications for metabolic inflammation and insulin resistance
Source: PubMed Central journal article supplement — Ther Adv Endocrinol Metab. 2020 Jul 1;11:2042018820930902. doi: 10.1177/2042018820930902 (PMC7331767; doi:10.1177/2042018820930902), 2020-07-01
Supplement: sj-pdf-1-tae-10.1177_2042018820930902.pdf [file sj-pdf-1-tae-10.1177_2042018820930902.pdf]

1 **Supplemental Table 1** : List of TaqMan Assays used for RT-PCR

| Gene          | Assay ID      | Gene           | Assay ID      |
|---------------|---------------|----------------|---------------|
| CXCL9         | Hs00171065_m1 | CCL18          | Hs00268113_m1 |
| CXCL10        | Hs01124251_g1 | CCL19          | Hs00171149_m1 |
| CXCL11        | Hs04187682_g1 | CCL20          | Hs01011368_m1 |
| IL-1 $\beta$  | Hs01555410_m1 | CCR2           | Hs00704702_s1 |
| IL-2          | Hs00174114_m1 | CCR5           | Hs99999149_s1 |
| IL-5          | Hs01548712_g1 | CD86           | Hs01567026_m1 |
| IL-6          | Hs00985639_m1 | CD163          | Hs00174705_m1 |
| IL-12A        | Hs01073447_m1 | TLR2           | Hs01872448_s1 |
| IL-13         | Hs00174379_m1 | TLR3           | Hs01551078_m1 |
| TNF- $\alpha$ | Hs01113624_g1 | TLR4           | Hs00152939_m1 |
| CCL2          | Hs00234140_m1 | TLR7           | Hs01933259_s1 |
| CCL3          | Hs04194942_s1 | TLR8           | Hs00152972_m1 |
| CCL5          | Hs00982282_m1 | TLR9           | Hs00370913_s1 |
| CCL8          | Hs04187715_m1 | TLR10          | Hs01935337_s1 |
| CCL7          | Hs00171147_m1 | MyD88          | Hs01573837_g1 |
| CCL11         | Hs00237013_m1 | IRF3           | Hs01547283_m1 |
| CCL15         | Hs00361122_m1 | IRF5           | Hs00158114_m1 |
| GAPDH         | Hs03929097_g1 | NF- $\kappa$ B | Hs00765730_m1 |

2
